# Supplementary material for: Bi2Te3-based wearable thermoelectric generator with high power density: from structure design to application
Source: Royal Society of Chemistry journal article supplement (doi:10.1039/d2tc00426g), 2022-01-01
Supplement: d2tc00426g1.pdf [file d2tc00426g1.pdf]

**Supporting Information for:**

**Bi<sub>2</sub>Te<sub>3</sub>-based wearable thermoelectric generator with high power density: from structure design to application**

Xiong Yuan<sup>1#</sup>, Zhenming Li<sup>2#</sup>, Yuying Shao<sup>3#</sup>, Dongwang Yang<sup>1\*</sup>, Kai Hu<sup>1</sup>, Han You<sup>1</sup>,  
Zhuoming Xu<sup>1</sup>, Siheng Hua<sup>1</sup>, Wei Liu<sup>2</sup>, Peng Peng<sup>3</sup>, Yonggao Yan<sup>1\*</sup>, and Xinfeng  
Tang<sup>1\*</sup>

<sup>1</sup>*State Key Laboratory of Advanced Technology for Materials Synthesis and Processing,  
Wuhan University of Technology, Wuhan 430070, China*

<sup>2</sup>*Energy Storage and Novel Technology of Electrical Engineering Department, China  
Electric Power Research Institute Limited Company, Beijing 100192, China*

<sup>3</sup>*State Grid Shanghai Municipal Electric Power Company, Shanghai 200025, China*

# These Authors contribute equally to the paper

\* Correspondence and requests for materials should be addressed to Dongwang Yang  
([ydongwang@whut.edu.cn](mailto:ydongwang@whut.edu.cn)), Yonggao Yan ([yanyonggao@whut.edu.cn](mailto:yanyonggao@whut.edu.cn)) or to  
Xinfeng Tang ([tangxf@whut.edu.cn](mailto:tangxf@whut.edu.cn)).

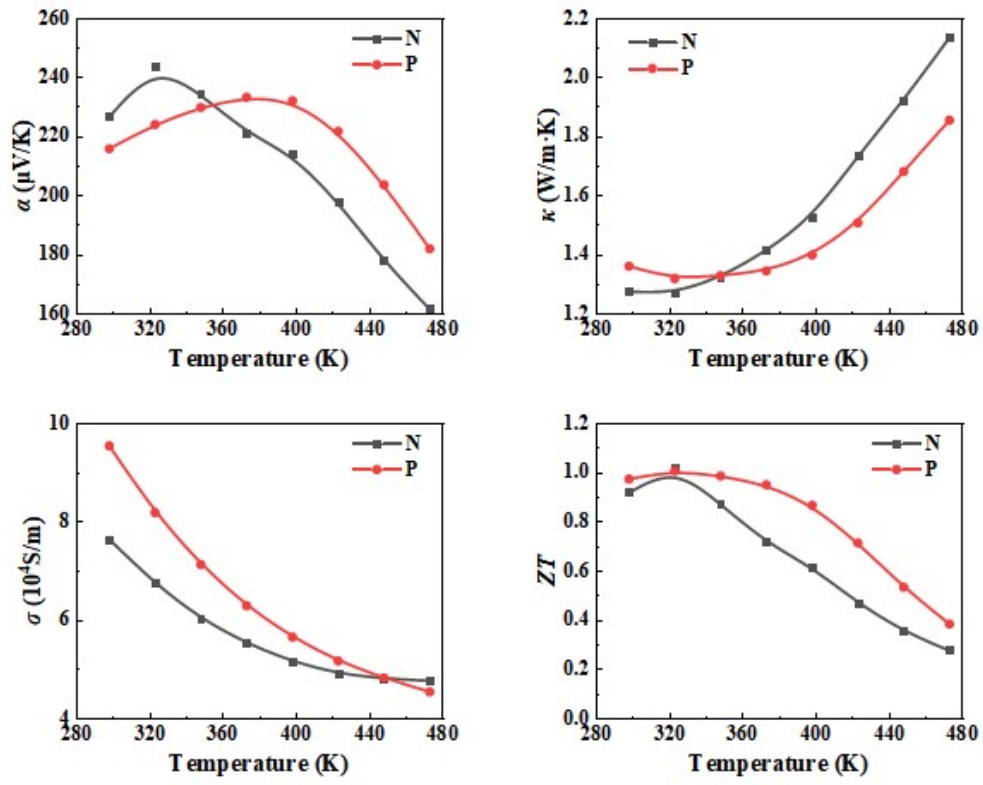

**Figure S1.** The TE parameters of the P-type and N-type TE legs

A

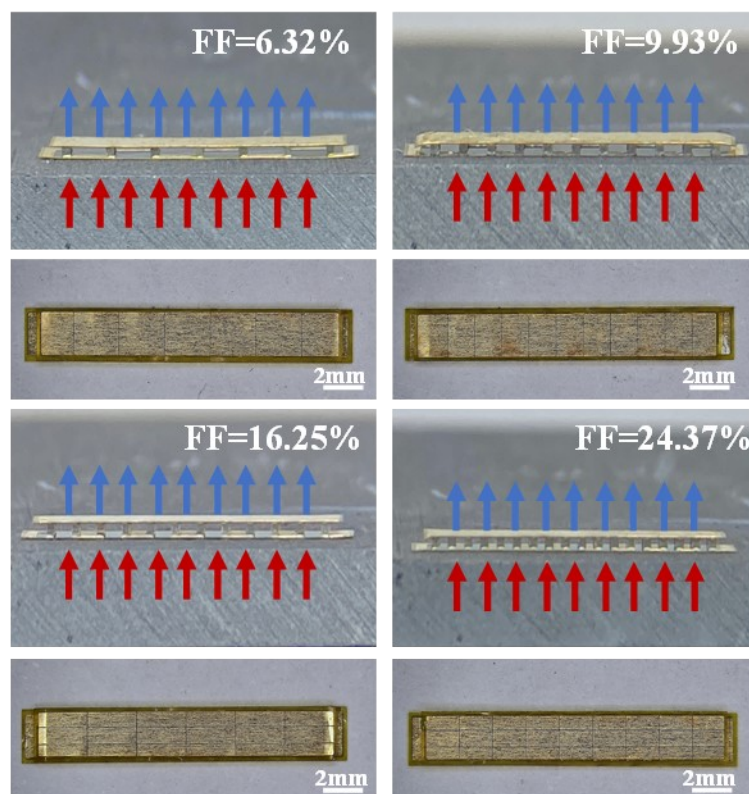

B

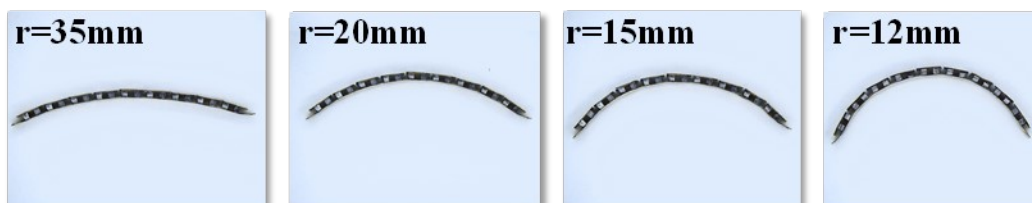

**Figure S2.** (A) Micro thermoelectric generators with four different fill factors. (B)

the values of bending radius during the bending process of generator.

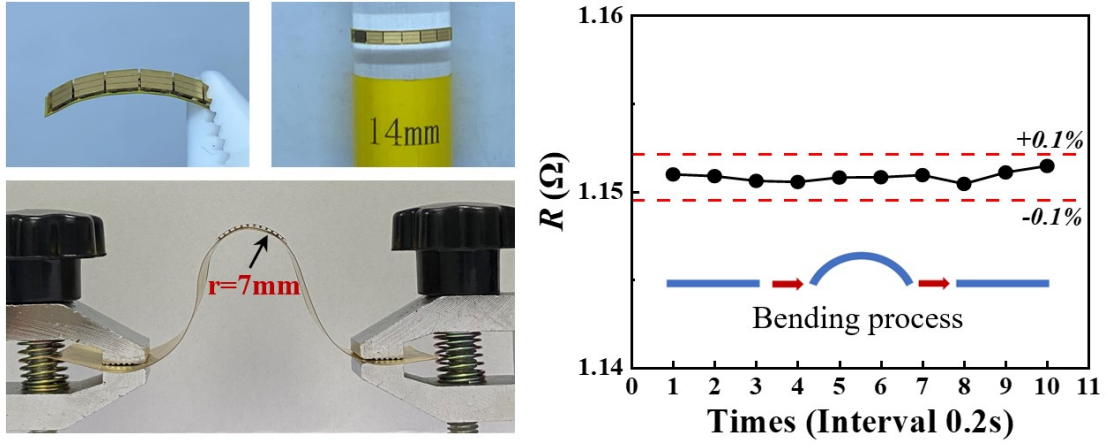

**Figure S3.** The resistance of the thermoelectric generator (fill factor = 16.25%;  $2 \times 16 \text{ mm}^2$  in plane, TE leg:  $0.4 \times 0.4 \times 0.5 \text{ mm}^3$ ) in a bending cycle.

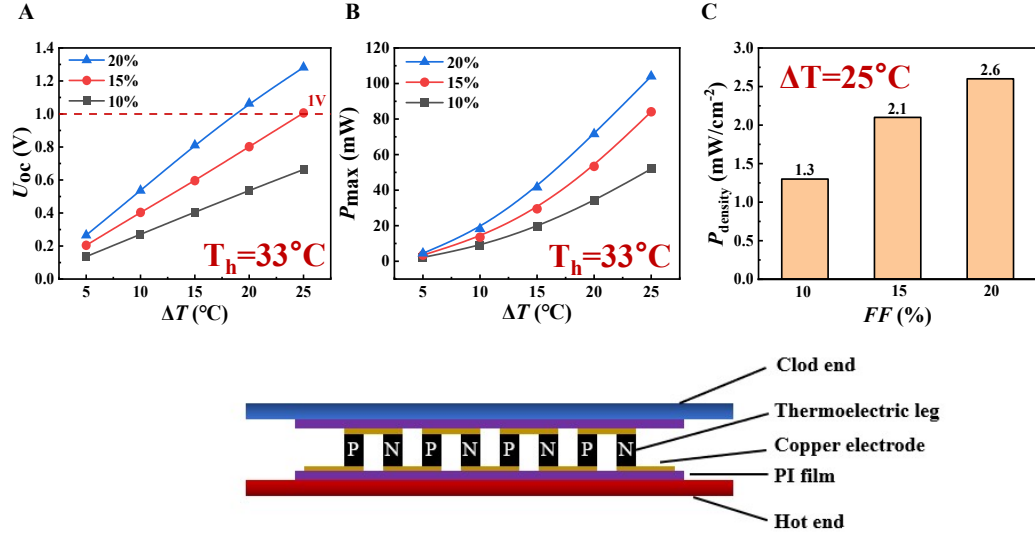

**Figure S4.** The open circuit voltage and the output power for the thermoelectric generators under different temperature differences (Large area TEG with FF=15%;  $T_h = 33^\circ\text{C}$  and  $T_c = 8^\circ\text{C}$ ).

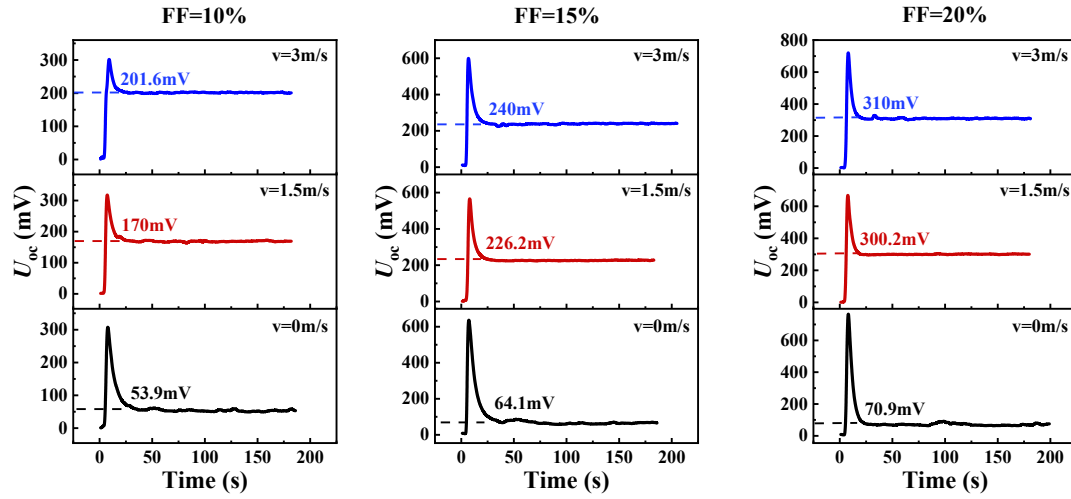

**Figure S5.** The output circuit voltage of the generators with different fill factors (10%, 15%, 20%) when worn on the arm at different moving speeds (0, 1.5 m/s and 3 m/s).

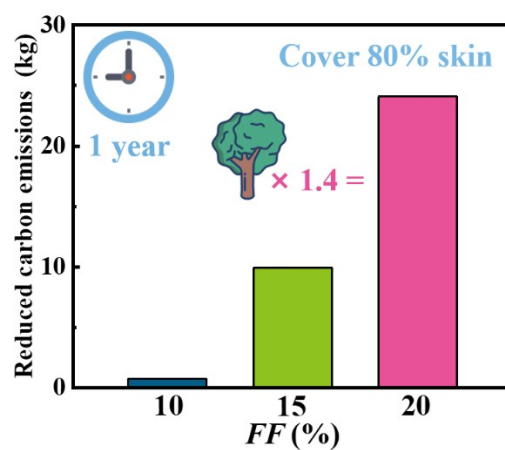

**Figure S6.** The energy saving and carbon emission reduction capabilities of the wearable thermoelectric generator with 20% fill factor covering 80% skin of the human body for one year.
